# Supplementary material for: Genome-wide standing variation facilitates long-term response to bidirectional selection for antibody response in chickens
Source: PubMed Central journal article supplement (PMC5244587; doi:10.1186/s12864-016-3414-7), 2017-01-18
Supplement: 12864_2016_3414_MOESM5_ESM.pdf [file 12864_2016_3414_MOESM5_ESM.pdf]

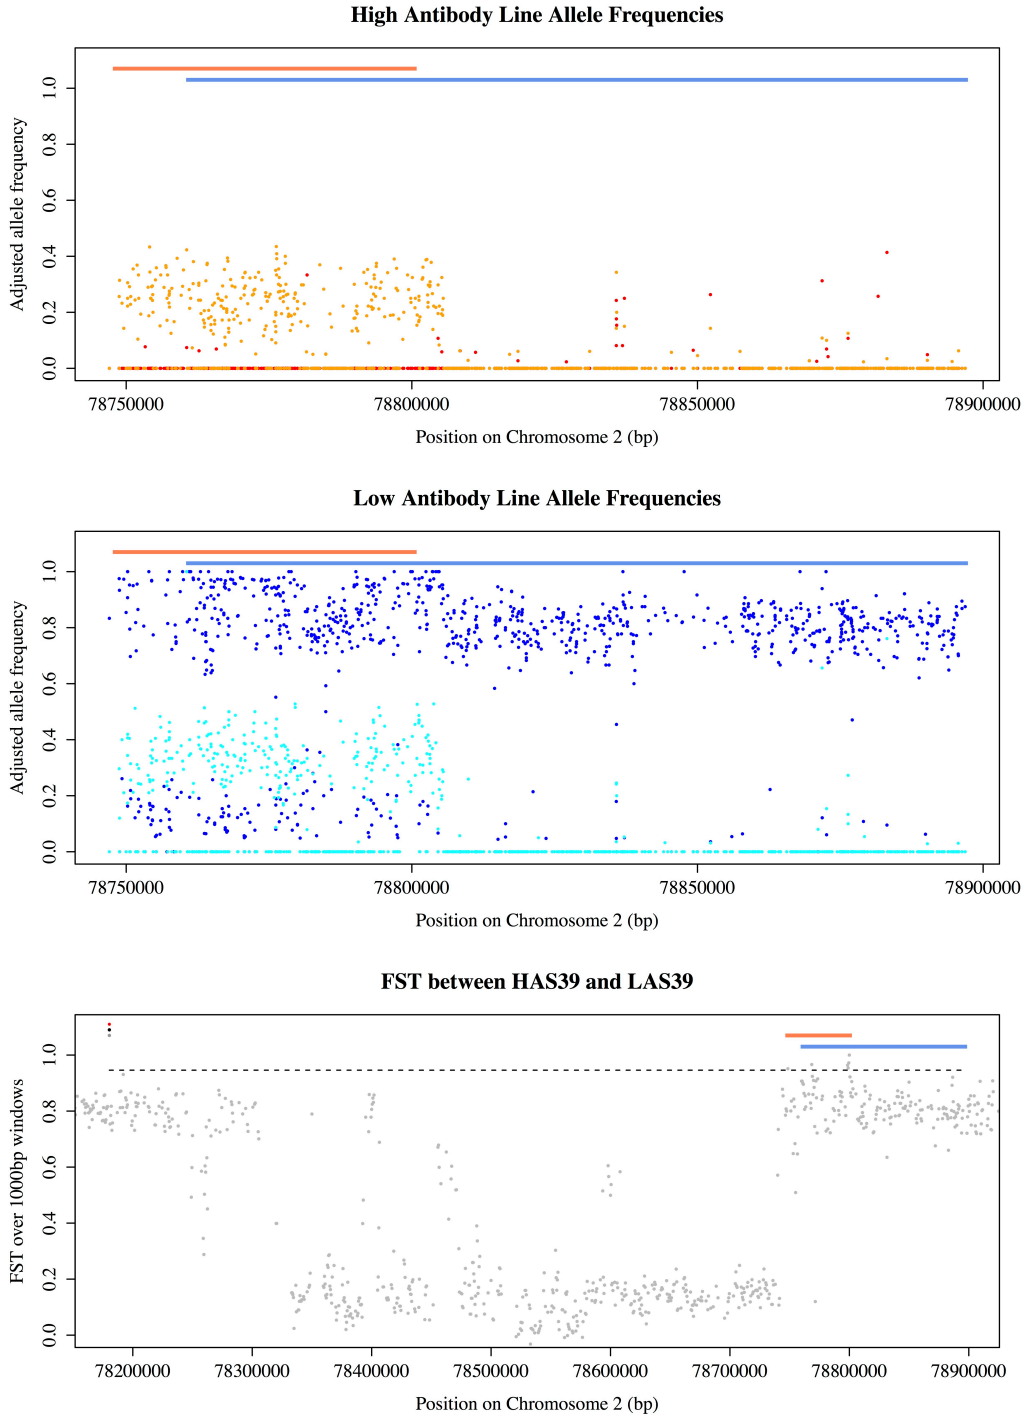

**Additional File 5 (figure):** Candidate sweep region in relation to rs14207559 and *SEMA5A* gene, showing allele frequency in HAS39 (red) and HAR16 (orange) (upper figure), LAS39 (blue) and LAR16 (teal) (middle figure) and the FST between HAS39 and LAS39 (grey) across a wider genomic region to show location of SNP marker rs14207559 (red dot) (lower figure). Candidate sweep region indicated with orange line and *SEMA5A* gene indicated with blue line in all figures.
