# Supplementary material for: Genome-wide standing variation facilitates long-term response to bidirectional selection for antibody response in chickens
Source: PubMed Central journal article supplement (PMC5244587; doi:10.1186/s12864-016-3414-7), 2017-01-18
Supplement: 12864_2016_3414_MOESM6_ESM.pdf [file 12864_2016_3414_MOESM6_ESM.pdf]

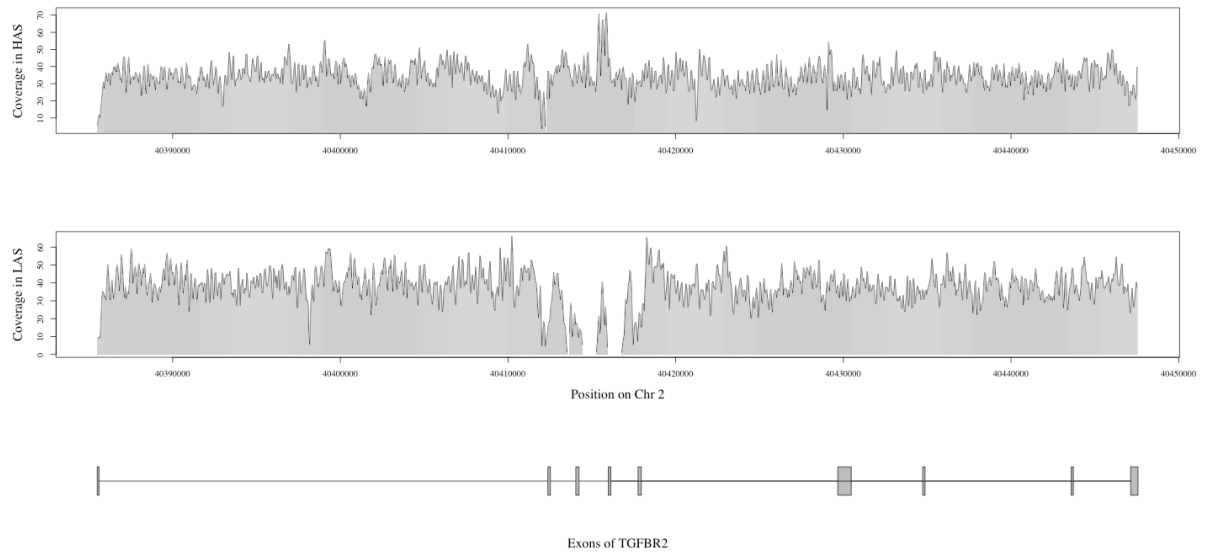

**Additional File 6 (figure):** Coverage in region (40,413,000-40,419,000) of the TGFBR2 gene (chr 2: 40,385,525 - 40,447,574) demonstrating deletion observes in LAS39 and LAR16, indicating fixation for the deletion-haplotype in the LAS line prior to founding of the relaxed line.
